# Supplementary material for: Functional Trait Responses of C4 Bunchgrasses to Fire Return Intervals in the Semi-Arid Savanna of South Africa
Source: MDPI journal article supplement (doi:10.3390/d15121201), 2023-12-07
Supplement: s1 [file s1]

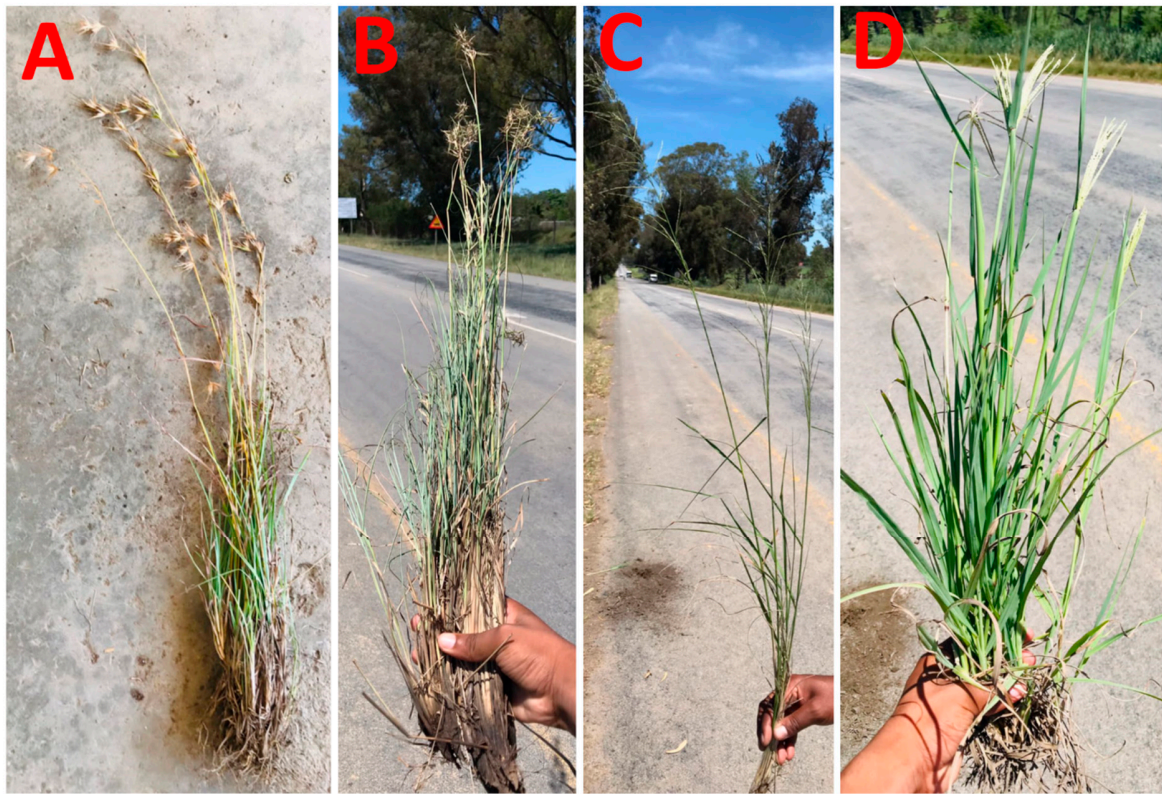

**Figure S1:** The bunchgrass species assessed for functional traits responses to fire return intervals. A = *Themeda triandra*, B = *Cymbopogon plurinodis*, C = *Sporobolus fimbriatus* and D = *Digitaria eriantha*.
